# Supplementary material
Source: ML conference proceedings conference paper supplement (https://openreview.net/forum?id=RnfyqrkOxD)
Supplement: supplementary_material [file datasets.pdf › datasets.pdf]

## 458 D CausRem

459 We construct the CausRem dataset by collecting 200 high-quality images from the free stock platform  
 460 Pexels<sup>1</sup>, including 100 images containing reflections and 100 with shadows. For each image, we  
 461 manually annotate the primary object along with its causal visual effects—reflections or shadows.

462 In the shadow subset, where multiple objects often co-occur, we randomly select two to three objects  
 463 per image for annotation. Each object and its corresponding shadow mask are stored using distinct  
 464 IDs to preserve one-to-one causal relationship. In the reflection subset, due to the presence of fewer  
 465 objects, we annotate only a single object-mask pair per image.

466 Fig. 8 and Fig. 9 illustrate representative annotation examples from the dataset.

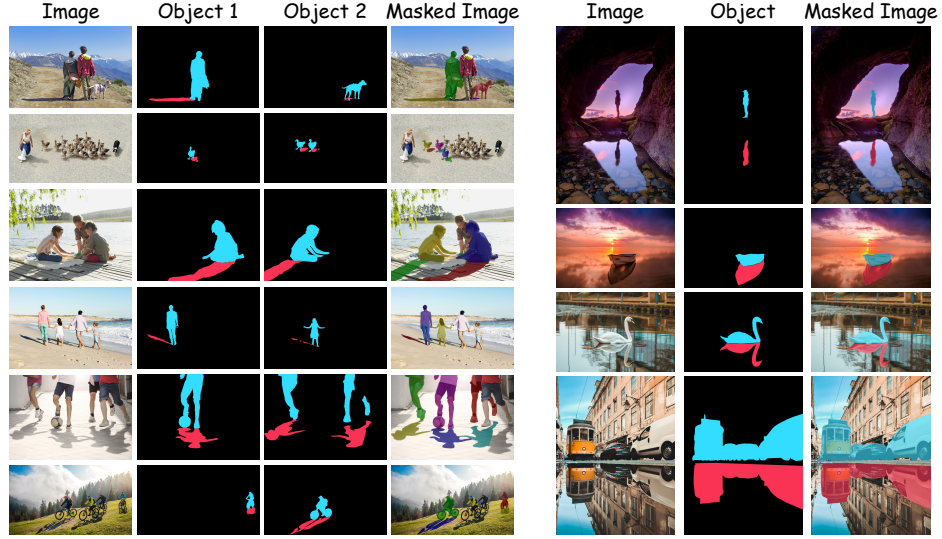

Figure 8: Representative annotations in CausRem. Left: shadow examples; Right: reflection examples.

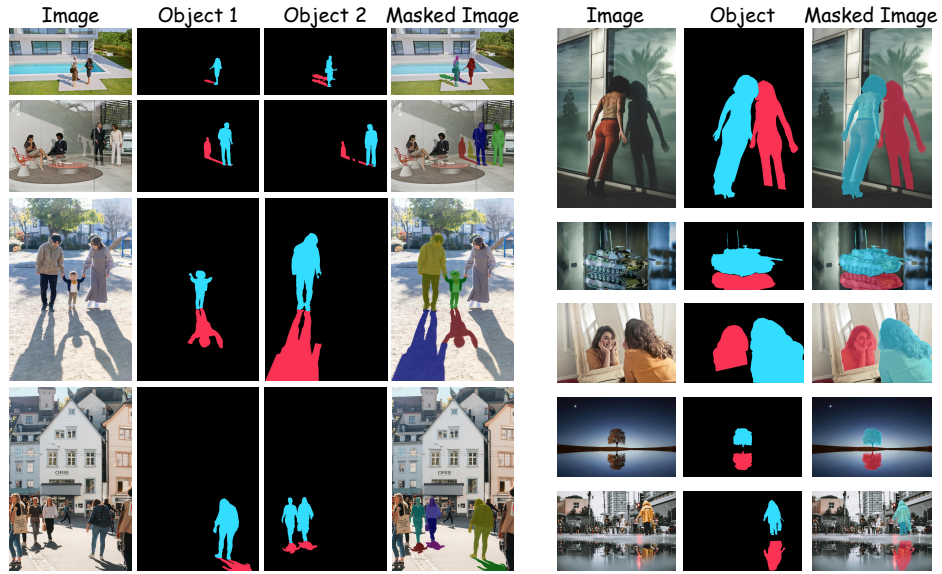

Figure 9: Representative annotations in CausRem. Left: shadow examples; Right: reflection examples.

<sup>1</sup><https://www.pexels.com>
